# Supplementary material for: Evidence of bad recycling practices: BFRs in children's toys and food-contact articles
Source: Royal Society of Chemistry journal article supplement (doi:10.1039/c7em00160f), 2017-01-01
Supplement: c7em00160f1.pdf [file c7em00160f1.pdf]

SI

LA-ICP-MS analysis for XRF validation

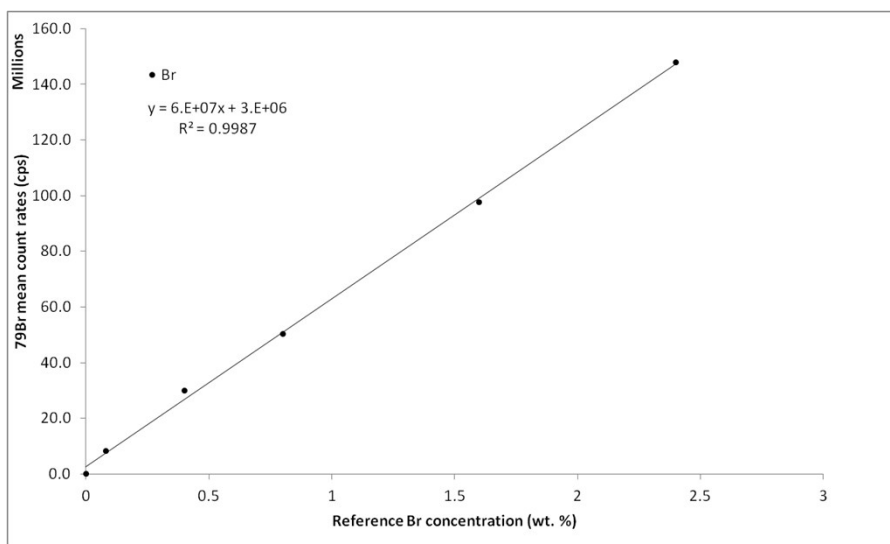

**Figure 1** Calibration curve for <sup>79</sup>Br in solid reference material done with LA-ICP-MS. The reference concentration was provided with the reference material's certificate and measured with neutron activation analysis.

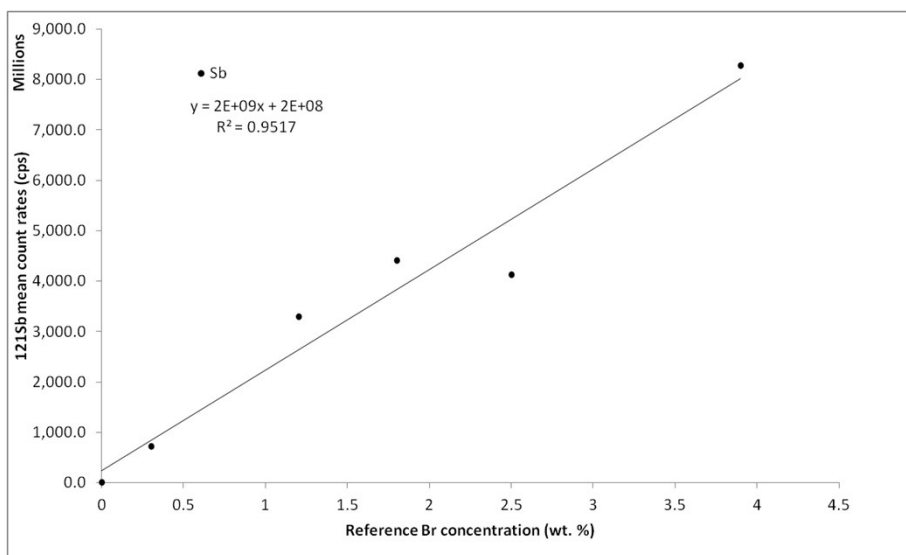

**Figure 2** Calibration curve for <sup>121</sup>Sb in solid reference material done with LA-ICP-MS. The reference concentration was provided with the reference material's certificate and measured with neutron activation analysis.

For LA-ICP-MS the LOD was 0.0001% of Br and 0.001% of Sb. The average accuracy was 93.3%, with the lowest value of 79%.

For XRF the LOD was 0.001% of Br and 0.0005% of Sb. The average accuracy, calculated comparing the XRF equivalent concentration values and the reference values was 93.9%.

For Br measurements of the calibration standards, the  $R^2$  observed is 0.9985, for the measurements of the real samples instead, when compared to the XRF data, the average relative residual was 11.1%. For Sb the calibration curve shows a slightly worse correlation ( $R^2=0.9517$ ) with the XRF results: this is likely due to the difference in micro-homogeneity (due to different polarities) between  $Sb_2O_3$  and BDE209, which affects the LA-ICP-MS (having a micrometric sampling area) but not XRF (0.8 cm sampling area)<sup>1</sup>.

The optimal thermal desorption settings, having the lowest debromination yield for decaBDE209, were: initial temperature 150°C, ramp rate 80°C min<sup>-1</sup> to 350°C and held for 2 min. Due to the risk of thermal debromination of PBDEs, an optimal GC interface temperature has been found at 300°C with a high and safe yield for decaBDE-209 and the lowest formation of thermal debromination products (heptaBDEs, octaBDEs and nonaBDEs). At higher temperatures than 310°C, thermal degradation of decaBDE-209 occurs with loss of sensitivity as a consequence.

Pyrolysis and thermal desorption GC-MS methods use the same hardware. After analysis, the sample cup is removed from the furnace by a pressurized shot system and caught in a sample cup-recovery container. The thermal desorption sequence is programmed so that firstly a blank sample cup without any sample or toluene extract is injected and measured in order to evaluate the background of the whole sample path and to screen potential carryover effects from a previous measured sample (sample path and carryover check). As a next step, a sample cup spiked with toluene and quartz wool plugs (without sample) is measured in order to see if there is any contamination from the toluene/quartz wool plug (reference blank measurement) and is then compared with two following measurements of a sample extract/or solid sample (generally performed in duplicate). This 4-position cycle including four measurements is repeated as many times as there are samples. The decision of repeating the measurements twice (instead of 3 times) is due to the fact that these analysis are merely done to confirm the presence of Br in the samples is due to BFRs and subsequently to use their relative content to obtain a semi-quantitative result when combined with total elemental Br quantification. The demonstrated hardware configuration and application has proven its effectiveness and stability in the past and is described elsewhere in more detail <sup>2-6</sup>.

**Table 1** Composition report of the Inter laboratory TV casing sample used for TD-GC-MS calibration.

| Results of TV casing composites (InterLab Sample Waste TV backplate) |          |                     |      |
|----------------------------------------------------------------------|----------|---------------------|------|
| Compounds                                                            | <i>n</i> | Mean Conc.          | %RSD |
| PBDEs                                                                |          | ( $\mu\text{g/g}$ ) |      |
| 2,4,4'-TrBDE (#28)                                                   | 4        | 0.024               | 10   |
| 2,2',4,4'-TeBDE (#47)                                                | 4        | 1.3                 | 15   |
| 2,2',4,4',5-PeBDE (#99)                                              | 4        | 3.2                 | 27   |
| 2,2',4,4',6-PeBDE (#100)                                             | 4        | 1.1                 | 39   |
| 2,2',4,4',5,5'-HxBDE (#153)                                          | 4        | 520                 | 26   |
| 2,2',4,4',5,6'-HxBDE (#154)                                          | 4        | 59                  | 22   |
| 2,2',3,4,4',5,6'-HpBDE (#183)                                        | 4        | 3700                | 21   |
| 2,2',3,3',4,4',5,6'-OBDE(#196)                                       | 2        | 930                 | --   |
| 2,2',3,3',4,4',6,6'-OBDE(#197)                                       | 2        | 2100                | --   |
| 2,2',3,3',4,4',5,5',6-NoBDE(#206)                                    | 2        | 3000                | --   |
| 2,2',3,3',4,4',5,6,6'-NoBDE(#207)                                    | 2        | 1950                | --   |
| DeBDE (#209)                                                         | 4        | 90000               | 19   |
| TrBDEs                                                               | 4        | 0.059               | 7    |
| TeBDEs                                                               | 4        | 1.4                 | 14   |
| PeBDEs                                                               | 4        | 5.8                 | 26   |
| HxBDEs                                                               | 4        | 620                 | 24   |
| HpBDEs                                                               | 4        | 3700                | 21   |
| OBDEs                                                                | 4        | 3000                | 25   |
| NoBDEs                                                               | 4        | 4800                | 19   |
| Other BFRs                                                           |          | ( $\mu\text{g/g}$ ) |      |
| TBBPA                                                                | 3        | 6800                | 11   |
| 2,4,6-Tribromophenol (TBP)                                           | 3        | 5                   | 44   |
| HBCD                                                                 | 2        | 13                  | --   |
| <i>n</i> : number of analysis                                        |          |                     |      |
| --: not calculated                                                   |          |                     |      |

The Inter laboratory TV casing sample was a composite of 50 cathode ray tube (CRT) back casings (high impact polystyrene) that had been melted and remoulded to form a material for interlaboratory tests. The data in this table was part of a recent study <sup>7</sup> and obtained analyzing four replicates of the TV casing using methods reported previously <sup>8</sup>

**Table 2** TD-GC-MS method operating ranges

| Compound                | Method operating range (mg/Kg <sup>-1</sup> ) |
|-------------------------|-----------------------------------------------|
| PBDEs (tri- to decaBDE) | 1-10000                                       |
| TBBPA                   | 70-7000                                       |
| DBDPE                   | 20-10000                                      |
| BTDPE                   | 90-10000                                      |

**Table 3** Br and Sb concentrations obtained with XRF. The analytical error is calculated as a function of SD between triplicate measurements

|                                          | <b>Manufacture<br/>d</b> | <b>Purchased</b>  | <b>Br%</b> | <b>+/- Br%</b> | <b>Sb %</b>  | <b>+/- Sb<br/>%</b> |
|------------------------------------------|--------------------------|-------------------|------------|----------------|--------------|---------------------|
| <b>Shield toy</b>                        | China                    | Czech<br>Republic | 0.01346358 | 0.00216<br>8   | 0.01134<br>6 | 0.00473<br>4        |
| <b>sword toy</b>                         | China                    | Czech<br>Republic | 0.01081421 | 0.00728<br>4   | 0.01258<br>8 | 0.00751<br>6        |
| <b>Olympics medal toy</b>                | China                    | Czech<br>Republic | 0.00989921 | 0.00428<br>7   | 0.00835<br>9 | 0.00579<br>8        |
| <b>Rubik's cube - Czech<br/>Republic</b> | China                    | Czech<br>Republic | 0.01839725 | 0.00673<br>3   | 0.01447<br>7 | 0.00464<br>2        |
| <b>Rubik's cube - German</b>             | China                    | Germany           | 0.07148304 | 0.00168<br>4   | 0.02936<br>5 | 0.00612<br>6        |
| <b>Black Gun toy</b>                     | China                    | Germany           | 0.50140797 | 0.02219<br>4   | 0.25796<br>6 | 0.01508<br>4        |
| <b>Star Wars cereal bowl</b>             | China                    | Germany           | <LOD       | 0.00260<br>2   | <LOD         | 0.00413<br>4        |
| <b>thermal cup</b>                       | China                    | Germany           | <LOD       | 0.00823<br>8   | <LOD         | 0.00446<br>2        |
| <b>small gun toy</b>                     | China                    | Italy             | <LOD       | 0.00039<br>2   | <LOD         | 0.00452<br>2        |
| <b>binocular toy</b>                     | China                    | Italy             | <LOD       | 0.00123<br>8   | <LOD         | 0.00469<br>4        |
| <b>target man toy</b>                    | China                    | Italy             | 0.00242712 | 0.00076<br>4   | <LOD         | 0.00481<br>4        |
| <b>spring gun toy</b>                    | China                    | Italy             | 0.07243877 | 0.00083<br>3   | 0.03754<br>7 | 0.00442<br>2        |
| <b>spring gun red toy</b>                | China                    | Italy             | <LOD       | 0.00132<br>6   | <LOD         | 0.00612<br>6        |
| <b>black spring car</b>                  | China                    | Germany           | 0.20782717 | 0.00048<br>2   | 0.08929<br>3 | 0.01027             |
| <b>black spring car</b>                  | China                    | Germany           | 0.12425598 | 0.00051<br>9   | 0.05424<br>2 | 0.00807<br>4        |
| <b>blue car launcher</b>                 | China                    | Germany           | 0.05360062 | 0.00063<br>7   | <LOD         | 0.00818<br>2        |
| <b>grey car launcher</b>                 | China                    | Germany           | 1.69729232 | 0.00230<br>1   | 0.84359      | 0.00517<br>4        |
| <b>grey miniature car</b>                | China                    | Germany           | 0.12114610 | 0.00045<br>1   | 0.09125<br>4 | 0.00601<br>6        |
| <b>black miniature car</b>               | China                    | Germany           | 0.15072552 | 0.00042<br>1   | 0.06964<br>8 | 0.00335<br>8        |
| <b>thermal cup</b>                       | China                    | Czech<br>Republic | 0.00214753 | 0.00040<br>2   | 0.00361<br>9 | 0.00718             |
| <b>thermal cup</b>                       | China                    | Czech<br>Republic | <LOD       | 0.00267<br>2   | <LOD         | 0.00428<br>6        |

|                         |        |                |                 |              |              |              |
|-------------------------|--------|----------------|-----------------|--------------|--------------|--------------|
| <b>thermal cup</b>      | China  | Czech Republic | 0.12215320<br>3 | 0.00035<br>2 | 0.07190<br>7 | 0.00593      |
| <b>thermal cup</b>      | China  | Czech Republic | <LOD            | 0.00272<br>4 | <LOD         | 0.0043       |
| <b>thermal cup</b>      | Turkey | Czech Republic | 0.12464968<br>1 | 0.00878<br>6 | 0.07365<br>2 | 0.00787<br>4 |
| <b>thermal cup</b>      | Turkey | Czech Republic | <LOD            | 0.00034<br>8 | <LOD         | 0.00463<br>6 |
| <b>thermal cup</b>      | Turkey | Czech Republic | <LOD            | 0.0003       | <LOD         | 0.00432<br>4 |
| <b>Radio back panel</b> | China  | Czech Republic | 0.51188252<br>9 | 0.00037      | 0.34397<br>4 | 0.00499<br>8 |

**Table 4** Overview of ATR-FTIR and pyrolysis GC-MS data on polymer composition

| Sample        | Main polymer <sup>a</sup> | Impurities/majors <sup>b</sup> |    |      |      |         |
|---------------|---------------------------|--------------------------------|----|------|------|---------|
|               |                           | PS/HIPS/ABS/SAN                | PC | PMMA | PA6  | PET/PBT |
| Rubik's cube  | HIPS                      | +                              | +  | +    | +    | +       |
| Toy gun       | HIPS                      | +                              | +  | +    | +    | +       |
| Spring car    | HIPS                      | +                              | +  | +    | n.d. | +       |
| Spring car    | HIPS                      | +                              | +  | +    | n.d. | +       |
| Car launcher  | HIPS                      | +                              | +  | n.d. | n.d. | +       |
| Miniature car | PS                        | +                              | +  | +    | n.d. | +       |
| Miniature car | PS                        | +                              | +  | +    | n.d. | +       |
| Spring gun    | HIPS                      | +                              | +  | +    | n.d. | +       |
| Thermal Cup   | ABS                       | +                              | +  | +    | n.d. | +       |
| Thermal Cup   | ABS                       | +                              | +  | +    | n.d. | +       |
| Radio cover   | ABS                       | +                              | +  | +    | n.d. | +       |

<sup>a</sup>Data obtained by FTIR

<sup>b</sup> Data obtained by pyrolysis GC-MS; the symbol "+" means that polymer's specific precursors were detected in the pyrogram while "n.d." means not detected. The polymer precursors in the pyrogram are styrene (PS/HIPS/ABS/SAN); bisphenol A (PC); methylmethacrylate (PMMA); caprolactam (PA6) and benzoic acid (PET/PBT).

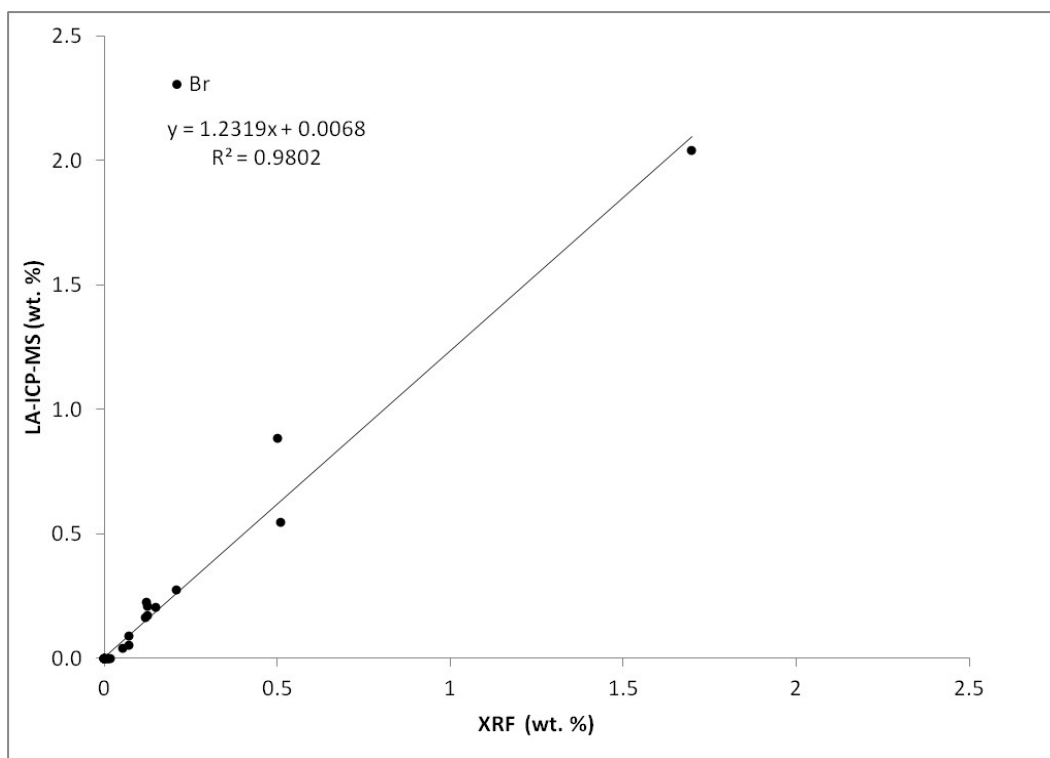

**Figure 3** Comparison of Br concentration values obtained with XRF and with LA-ICP-MS ( $^{79}\text{Br}$ ).

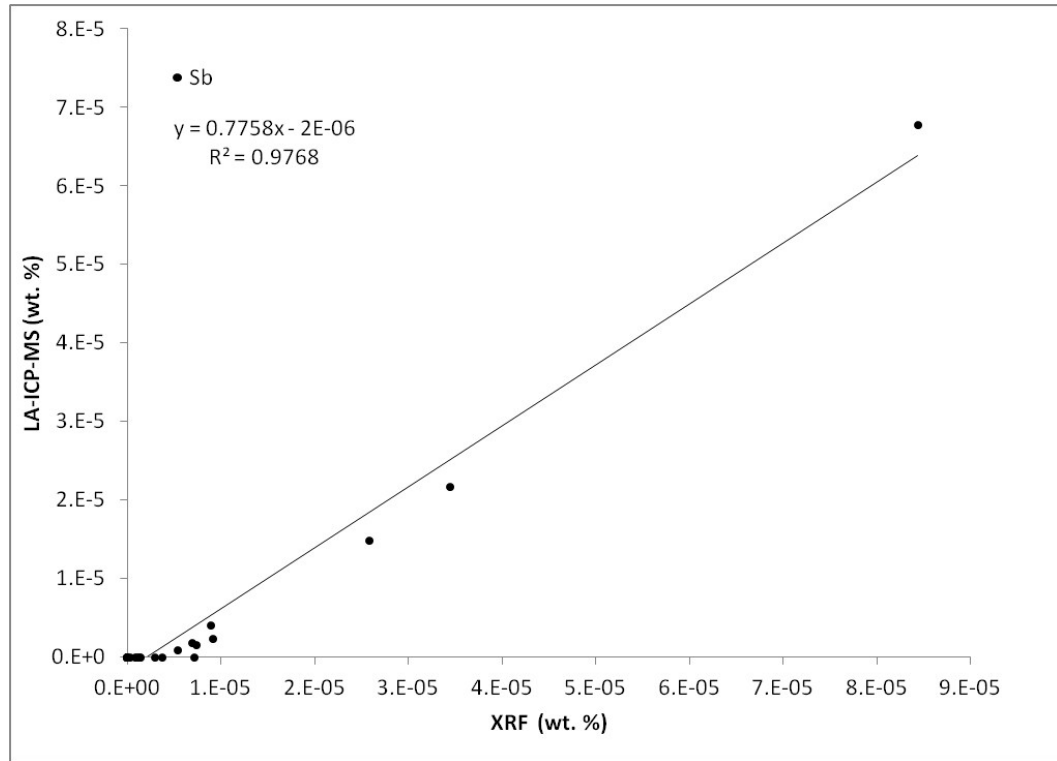

**Figure 4** Comparison of Sb concentration values obtained with XRF and with LA-ICP-MS (<sup>121</sup>Sb).



## References

- 1 A. Guzzonato, F. Puype, S.J. Harrad, *Chemosphere*, 2016, 159, 89-95.
- 2 Samsoněk J, Puype F, Vít D. 2007. Rapid determination of certain BFRs in plastics by X-ray fluorescence spectrometry (XRF) and thermal desorption GC-MS (TD-GC-MS) for the RoHS directive. *Organohalogen Compounds*. 69:2789–2792.
- 3 Samsoněk J, Puype F. 2013. Occurrence of brominated flame retardants in black thermos cups and selected kitchen utensils purchased on the European market. *Food Additives and Contaminants: Part A*. 30(11):1976-1986.
- 4 Hosaka A, Watanabe Ch, Tsung S. 2005. Rapid determination of decabromodiphenyl ether in polystyrene by thermal desorption- GC/MS. *Anal Sci*. 21:1145–1147.
- 5 Puype F and Samsoněk J. 2013. The application of thermal desorption and reactive pyrolysis – gas chromatography – mass spectrometry for the identification of end-capped brominated epoxy based polymers based on tetrabromobisphenol A diglycidyl ether in PBT. *Proceedings from PMA 2013 & SRC 2013*. ISSN 0009-2770:167-169.
- 6 Puype F, Samsoněk J, Ambros J. 2014. Internal standardization for analytical pyrolysis, thermal desorption and quantitative in-source desorption by electron impact ionization: improvements and strategies for polymer science, *Proceedings from PLASTKO 2014*. ISBN 978-80-7454-335-7, 138-141.
- 7 C. Rauert, Harrad, S. “Mass transfer of PBDEs from plastic TV casing to indoor dust via three migration pathways — A test chamber investigation”, *Science of the Total Environment*, 536, 568-574 (2015)
- 8 Takigami, H., Suzuki, G., Hirai, Y., Sakai, S.-I., 2008. Transfer of brominated flame retardants from components into dust inside television cabinets. *Chemosphere* 73, 161–169.
